# Supplementary material
Source: MDPI journal article supplement (https://www.mdpi.com/2673-7264/4/2/12)
Supplement: s1 [file s1]

## Supplementary Materials

# The Effect of Temperature on the London Dispersive and Lewis Acid-base Surface Energies of Poly Methyl Methacrylate Adsorbed on Silica by Inverse Gas Chromatography

Tayssir Hamieh<sup>1,2</sup>

<sup>1</sup>Faculty of Science and Engineering, Maastricht University, P.O. Box 616, 6200 MD Maastricht, Netherlands

<sup>2</sup>Laboratory of Materials, Catalysis, Environment and Analytical Methods (MCEMA), Faculty of Sciences, Lebanese University, Hadath, Lebanon

Correspondence: Faculty of Science and Engineering, Maastricht University, P.O. Box 616, 6200 MD Maastricht, The Netherlands, E-mail: [t.hamieh@maastrichtuniversity.nl](mailto:t.hamieh@maastrichtuniversity.nl)

**Table S1.** Values of  $RT\ln V_n$  (kJ/mol) of n-alkanes adsorbed on silica particles as a function of the temperature

| T(K)   | C5     | C6     | C7     | C8     | C9     |
|--------|--------|--------|--------|--------|--------|
| 303.15 | 10.500 | 14.699 | 18.816 | 23.029 | 27.189 |
| 313.15 | 9.135  | 13.187 | 17.142 | 21.189 | 25.177 |
| 323.15 | 7.814  | 11.689 | 15.451 | 19.299 | 23.080 |
| 328.15 | 7.256  | 10.940 | 14.602 | 18.348 | 22.022 |
| 333.15 | 6.393  | 10.127 | 13.731 | 17.415 | 21.025 |
| 338.15 | 5.880  | 9.534  | 13.048 | 16.808 | 20.026 |
| 343.15 | 5.514  | 9.109  | 12.555 | 16.076 | 19.515 |
| 348.15 | 5.088  | 8.616  | 11.985 | 15.424 | 18.779 |
| 353.15 | 4.683  | 8.165  | 11.476 | 14.854 | 18.144 |
| 363.15 | 3.576  | 6.937  | 10.102 | 13.326 | 16.454 |
| 373.15 | 2.643  | 5.853  | 8.838  | 11.875 | 14.802 |
| 378.15 | 2.361  | 5.540  | 8.477  | 11.458 | 14.330 |
| 383.15 | 1.829  | 4.977  | 7.861  | 10.784 | 13.594 |
| 388.15 | 1.315  | 4.336  | 7.169  | 10.035 | 12.784 |
| 393.15 | 0.853  | 3.919  | 6.673  | 9.564  | 12.112 |
| 398.15 | 0.685  | 3.741  | 6.453  | 9.184  | 11.786 |
| 403.15 | -0.065 | 2.992  | 5.667  | 8.352  | 10.904 |
| 408.15 | -0.621 | 2.426  | 5.045  | 7.666  | 10.147 |
| 413.15 | -0.901 | 2.152  | 4.721  | 7.281  | 9.695  |
| 423.15 | -1.453 | 1.697  | 4.189  | 6.645  | 8.940  |

|        |        |        |       |       |       |
|--------|--------|--------|-------|-------|-------|
| 433.15 | -2.915 | 1.662  | 4.108 | 6.153 | 7.834 |
| 443.15 |        | 0.824  | 3.171 | 5.296 | 7.225 |
| 453.15 |        | 0.148  | 2.554 | 4.641 | 6.503 |
| 463.15 |        | -0.465 | 2.159 | 4.257 | 6.083 |
| 473.15 |        |        | 1.947 | 4.117 | 5.781 |

**Table S2.** Values of parameter  $2\mathcal{N}a (\gamma_l^d)^{1/2} (m^2 \times mJ^{1/2})$  of n-alkanes adsorbed on solid particles as a function of the temperature

| T(K)   | C5    | C6    | C7    | C8    | C9    |
|--------|-------|-------|-------|-------|-------|
| 303.15 | 2.084 | 2.496 | 2.860 | 3.262 | 3.634 |
| 313.15 | 2.023 | 2.440 | 2.806 | 3.209 | 3.580 |
| 323.15 | 1.957 | 2.381 | 2.750 | 3.152 | 3.523 |
| 328.15 | 1.922 | 2.350 | 2.720 | 3.123 | 3.494 |
| 333.15 | 1.886 | 2.318 | 2.689 | 3.093 | 3.463 |
| 338.15 | 1.848 | 2.284 | 2.658 | 3.062 | 3.432 |
| 343.15 | 1.809 | 2.250 | 2.626 | 3.030 | 3.400 |
| 348.15 | 1.768 | 2.214 | 2.592 | 2.997 | 3.367 |
| 353.15 | 1.726 | 2.178 | 2.558 | 2.963 | 3.333 |
| 363.15 | 1.635 | 2.100 | 2.486 | 2.893 | 3.263 |
| 373.15 | 1.535 | 2.017 | 2.409 | 2.818 | 3.189 |
| 378.15 | 1.481 | 1.973 | 2.369 | 2.779 | 3.151 |
| 383.15 | 1.424 | 1.927 | 2.327 | 2.739 | 3.111 |
| 388.15 | 1.364 | 1.879 | 2.284 | 2.698 | 3.071 |
| 393.15 | 1.299 | 1.829 | 2.240 | 2.655 | 3.029 |
| 398.15 | 1.231 | 1.777 | 2.193 | 2.611 | 2.986 |
| 403.15 | 1.157 | 1.723 | 2.145 | 2.565 | 2.941 |
| 408.15 | 1.076 | 1.665 | 2.096 | 2.518 | 2.895 |
| 413.15 | 0.988 | 1.605 | 2.044 | 2.469 | 2.848 |
| 423.15 | 0.776 | 1.474 | 1.933 | 2.367 | 2.750 |
| 433.15 | 0.464 | 1.326 | 1.813 | 2.256 | 2.644 |
| 443.15 |       | 1.153 | 1.680 | 2.137 | 2.531 |
| 453.15 |       | 0.943 | 1.530 | 2.006 | 2.410 |
| 463.15 |       | 0.661 | 1.360 | 1.863 | 2.278 |
| 473.15 |       |       | 1.160 | 1.703 | 2.135 |

**Table S3.** Values of the transition temperatures of PMMA adsorbed on silica particles at different recovery fractions.

| Recovery fraction of PMMA/silica $\theta$ | Beta-relaxation temperature $T_\beta$ (in K) | Glass transition temperature $T_g$ (in K) | Liquid-liquid temperature $T_{l-l}$ (in K) |
|-------------------------------------------|----------------------------------------------|-------------------------------------------|--------------------------------------------|
| 0.31                                      | 333.15                                       | 383.15                                    | 433.15                                     |
| 0.54                                      | 343.15                                       | 398.15                                    | 443.15                                     |
| 0.83                                      | 338.15                                       | 393.15                                    | 433.15                                     |
| 0.98                                      | 333.15                                       | 383.15                                    | 443.15                                     |
| 1.0                                       | 333.15                                       | 383.15                                    | 443.15                                     |
| PMMA                                      | 333.15                                       | 388.15                                    | 433.15                                     |

**Table S4.** Variations of  $\Delta G_a^{sp}(T)$  (kJ/mol) of dichloromethane adsorbed on silica particles and PMMA/silica as a function of the temperature, at different recovery fractions.  $\theta = 0$  (silica case),  $\theta = 0.31$ ,  $\theta = 0.83$ ,  $\theta = 1.0$ , and  $\theta \gg 1$  (PMMA case).

| T(K)   | $\theta = 0$ (Silica case) | $\theta = 0.31$ | $\theta = 0.83$ | $\theta = 1.0$ | $\theta \gg 1$ (PMMA case) |
|--------|----------------------------|-----------------|-----------------|----------------|----------------------------|
| 303.15 | 25.241                     | 20.777          | 27.605          | 36.031         | 18.520                     |
| 313.15 | 24.896                     | 19.604          | 25.780          | 31.827         | 16.940                     |
| 323.15 | 24.807                     | 18.973          | 24.330          | 27.832         | 16.034                     |
| 328.15 | 24.379                     | 18.169          | 24.125          | 26.052         | 15.902                     |
| 333.15 | 24.206                     | 18.442          | 24.143          | 25.107         | 17.105                     |
| 338.15 | 24.034                     | 18.608          | 24.970          | 23.004         | 14.792                     |
| 343.15 | 23.876                     | 19.382          | 23.919          | 22.303         | 15.055                     |
| 348.15 | 23.689                     | 18.336          | 23.804          | 23.918         | 15.178                     |
| 353.15 | 23.516                     | 18.364          | 23.752          | 24.387         | 14.911                     |
| 363.15 | 23.102                     | 18.115          | 22.566          | 24.438         | 13.717                     |
| 373.15 | 22.826                     | 17.019          | 21.338          | 23.218         | 12.279                     |
| 378.15 | 22.654                     | 17.200          | 21.114          | 23.350         | 13.019                     |
| 383.15 | 22.285                     | 16.865          | 21.872          | 25.912         | 14.521                     |
| 388.15 | 22.309                     | 17.412          | 23.872          | 28.129         | 10.832                     |
| 393.15 | 22.136                     | 18.243          | 22.237          | 25.838         | 12.707                     |
| 398.15 | 21.964                     | 19.648          | 21.453          | 22.887         | 12.170                     |
| 403.15 | 21.689                     | 21.423          | 21.428          | 18.964         | 11.776                     |
| 408.15 | 21.619                     | 19.980          | 20.973          | 18.878         | 11.631                     |
| 413.15 | 21.446                     | 18.756          | 20.481          | 19.192         | 11.135                     |
| 423.15 | 21.206                     | 17.133          | 20.132          | 19.875         | 11.458                     |
| 433.15 | 20.756                     | 16.598          | 21.753          | 17.697         | 13.574                     |
| 443.15 | 20.411                     | 21.255          | 19.670          | 14.849         | 10.220                     |
| 453.15 | 20.066                     | 18.117          | 19.017          | 15.433         | 9.388                      |
| 463.15 | 20.070                     | 15.912          | 22.320          | 16.389         | 8.917                      |
| 473.15 | 19.376                     | 12.895          | 17.745          | 16.525         | 7.776                      |

**Table S5.** Variations of  $\Delta G_a^{sp}(T)$  ( $kJ/mol$ ) of ethyl acetate adsorbed on silica particles and PMMA/silica as a function of the temperature, at different recovery fractions.  $\theta = 0$  (*silica case*),  $\theta = 0.31$ ,  $\theta = 0.83$ ,  $\theta = 1.0$ , and  $\theta \gg 1$  (*PMMA case*).

| T(K)   | $\theta = 0$ (Silica case) | $\theta = 0.31$ | $\theta = 0.83$ | $\theta = 1.0$ | $\theta \gg 1$ (PMMA case) |
|--------|----------------------------|-----------------|-----------------|----------------|----------------------------|
| 303.15 | 17.422                     | 14.300          | 20.114          | 21.479         | 16.029                     |
| 313.15 | 17.089                     | 12.803          | 18.354          | 20.360         | 14.694                     |
| 323.15 | 16.852                     | 12.216          | 16.800          | 18.376         | 14.037                     |
| 328.15 | 16.590                     | 11.486          | 16.021          | 17.682         | 14.498                     |
| 333.15 | 16.423                     | 11.672          | 15.604          | 17.746         | 15.192                     |
| 338.15 | 16.257                     | 11.637          | 16.923          | 17.019         | 13.243                     |
| 343.15 | 16.149                     | 11.926          | 16.634          | 16.908         | 13.912                     |
| 348.15 | 15.924                     | 10.618          | 16.379          | 17.644         | 14.430                     |
| 353.15 | 15.757                     | 10.503          | 16.315          | 17.500         | 14.285                     |
| 363.15 | 15.394                     | 9.424           | 14.651          | 16.971         | 13.499                     |
| 373.15 | 15.091                     | 7.416           | 12.867          | 15.990         | 12.891                     |
| 378.15 | 14.925                     | 7.107           | 12.511          | 16.213         | 13.325                     |
| 383.15 | 14.704                     | 6.584           | 13.086          | 18.321         | 14.659                     |
| 388.15 | 14.592                     | 6.829           | 14.790          | 20.016         | 11.700                     |
| 393.15 | 14.425                     | 7.413           | 12.425          | 17.162         | 10.781                     |
| 398.15 | 14.259                     | 8.909           | 9.449           | 15.325         | 12.783                     |
| 403.15 | 14.080                     | 8.802           | 11.597          | 14.041         | 13.202                     |
| 408.15 | 13.926                     | 7.117           | 11.654          | 13.365         | 13.460                     |
| 413.15 | 13.759                     | 7.482           | 11.281          | 13.009         | 13.146                     |
| 423.15 | 13.498                     | 7.003           | 11.137          | 13.139         | 13.434                     |
| 433.15 | 13.093                     | 7.619           | 12.413          | 14.366         | 15.576                     |
| 443.15 | 12.760                     | 11.397          | 10.859          | 12.211         | 13.114                     |
| 453.15 | 12.427                     | 11.040          | 10.113          | 12.355         | 12.620                     |
| 463.15 | 12.350                     | 9.852           | 12.954          | 12.883         | 12.645                     |
| 473.15 | 11.761                     | 8.197           | 7.945           | 12.504         | 11.811                     |

**Table S6.** Values of  $\gamma_s^+(T)$ ,  $\gamma_s^-(T)$ ,  $\gamma_s^{AB}(T)$ ,  $\gamma_s^d(T)$ , and  $\gamma_s^{tot.}(T)$  of silica particles and PMMA adsorbed on silica as a function of the temperature, at different recovery fractions:  $\theta = 0$  (*silica case*),  $\theta = 0.31$ ,  $\theta = 0.83$ ,  $\theta = 1.0$ , and  $\theta \gg 1$  (*PMMA case*).

| Silica, $\theta = 0$ |                 |                 |                    |                 |                      |
|----------------------|-----------------|-----------------|--------------------|-----------------|----------------------|
| T(K)                 | $\gamma_s^-(T)$ | $\gamma_s^+(T)$ | $\gamma_s^{AB}(T)$ | $\gamma_s^d(T)$ | $\gamma_s^{tot.}(T)$ |
| 303.15               | 350.30          | 119.37          | 408.98             | 116.29          | 525.28               |
| 313.15               | 337.36          | 113.70          | 391.70             | 106.48          | 498.18               |
| 323.15               | 331.59          | 109.46          | 381.03             | 95.37           | 476.39               |
| 328.15               | 318.64          | 105.55          | 366.78             | 88.87           | 455.65               |
| 333.15               | 312.58          | 102.93          | 358.73             | 86.42           | 445.16               |
| 338.15               | 306.60          | 100.35          | 350.81             | 81.23           | 432.04               |
| 343.15               | 301.10          | 98.53           | 344.48             | 77.81           | 422.29               |

|        |        |       |        |       |        |
|--------|--------|-------|--------|-------|--------|
| 348.15 | 294.92 | 95.33 | 335.34 | 73.68 | 409.02 |
| 353.15 | 289.20 | 92.88 | 327.80 | 70.45 | 398.25 |
| 363.15 | 276.37 | 87.78 | 311.52 | 62.86 | 374.38 |
| 373.15 | 267.17 | 83.54 | 298.79 | 54.33 | 353.12 |
| 378.15 | 261.86 | 81.31 | 291.83 | 51.68 | 343.52 |
| 383.15 | 252.17 | 78.54 | 281.47 | 48.93 | 330.40 |
| 388.15 | 251.49 | 76.97 | 278.25 | 45.55 | 323.81 |
| 393.15 | 246.41 | 74.86 | 271.63 | 43.01 | 314.64 |
| 398.15 | 241.41 | 72.79 | 265.12 | 40.28 | 305.39 |
| 403.15 | 234.28 | 70.64 | 257.28 | 38.02 | 295.30 |
| 408.15 | 231.64 | 68.76 | 252.41 | 35.25 | 287.66 |
| 413.15 | 226.87 | 66.80 | 246.22 | 31.13 | 277.34 |
| 423.15 | 219.69 | 63.68 | 236.55 | 27.85 | 264.40 |
| 433.15 | 208.48 | 59.35 | 222.47 | 23.93 | 246.40 |
| 443.15 | 199.70 | 55.84 | 211.20 | 21.53 | 232.73 |
| 453.15 | 191.19 | 52.46 | 200.31 | 18.74 | 219.05 |
| 463.15 | 189.47 | 51.33 | 197.23 | 16.34 | 213.57 |
| 473.15 | 174.96 | 46.12 | 179.65 | 15.47 | 195.13 |

PMMA/Silica,  $\theta = 0.31$

| T(K)   | $\gamma_s^-(T)$ | $\gamma_s^+(T)$ | $\gamma_s^{AB}(T)$ | $\gamma_s^d(T)$ | $\gamma_s^{tot.}(T)$ |
|--------|-----------------|-----------------|--------------------|-----------------|----------------------|
| 303.15 | 350.30          | 237.35          | 80.42              | 276.32          | 116.29               |
| 313.15 | 337.36          | 209.17          | 63.81              | 231.07          | 106.48               |
| 323.15 | 331.59          | 193.97          | 57.52              | 211.25          | 95.37                |
| 328.15 | 318.64          | 176.98          | 50.59              | 189.25          | 88.87                |
| 333.15 | 312.58          | 181.44          | 51.99              | 194.24          | 86.42                |
| 338.15 | 306.60          | 183.79          | 51.42              | 194.43          | 81.23                |
| 343.15 | 301.10          | 198.42          | 53.74              | 206.51          | 77.81                |
| 348.15 | 294.92          | 176.70          | 42.39              | 173.09          | 73.68                |
| 353.15 | 289.20          | 176.36          | 41.27              | 170.62          | 70.45                |
| 363.15 | 276.37          | 169.93          | 32.90              | 149.54          | 62.86                |
| 373.15 | 267.17          | 148.52          | 20.18              | 109.48          | 54.33                |
| 378.15 | 261.86          | 150.95          | 18.44              | 105.51          | 51.68                |
| 383.15 | 252.17          | 144.43          | 15.75              | 95.39           | 48.93                |
| 388.15 | 251.49          | 153.21          | 16.86              | 101.64          | 45.55                |
| 393.15 | 246.41          | 167.36          | 19.77              | 115.04          | 43.01                |
| 398.15 | 241.41          | 193.19          | 28.41              | 148.18          | 40.28                |
| 403.15 | 234.28          | 228.57          | 27.60              | 158.86          | 38.02                |
| 408.15 | 231.64          | 197.86          | 17.96              | 119.23          | 35.25                |
| 413.15 | 226.87          | 173.52          | 19.75              | 117.10          | 31.13                |
| 423.15 | 219.69          | 143.41          | 17.14              | 99.16           | 27.85                |
| 433.15 | 208.48          | 133.32          | 20.10              | 103.52          | 23.93                |
| 443.15 | 199.70          | 216.55          | 44.54              | 196.43          | 21.53                |
| 453.15 | 191.19          | 155.85          | 41.41              | 160.67          | 18.74                |

|        |        |        |       |        |       |
|--------|--------|--------|-------|--------|-------|
| 463.15 | 189.47 | 119.10 | 32.67 | 124.75 | 16.34 |
| 473.15 | 174.96 | 77.49  | 22.40 | 83.33  | 15.47 |

PMMA/Silica,  $\theta = 0.83$

| T(K)   | $\gamma_s^-(T)$ | $\gamma_s^+(T)$ | $\gamma_s^{AB}(T)$ | $\gamma_s^d(T)$ | $\gamma_s^{tot.}(T)$ |
|--------|-----------------|-----------------|--------------------|-----------------|----------------------|
| 303.15 | 350.30          | 418.98          | 159.12             | 516.40          | 116.29               |
| 313.15 | 337.36          | 361.73          | 131.16             | 435.63          | 106.48               |
| 323.15 | 331.59          | 318.95          | 108.78             | 372.54          | 95.37                |
| 328.15 | 318.64          | 312.03          | 98.43              | 350.51          | 88.87                |
| 333.15 | 312.58          | 310.94          | 92.92              | 339.95          | 86.42                |
| 338.15 | 306.60          | 330.96          | 108.75             | 379.42          | 81.23                |
| 343.15 | 301.10          | 302.17          | 104.54             | 355.47          | 77.81                |
| 348.15 | 294.92          | 297.81          | 100.86             | 346.61          | 73.68                |
| 353.15 | 289.20          | 295.03          | 99.58              | 342.81          | 70.45                |
| 363.15 | 276.37          | 263.70          | 79.52              | 289.61          | 62.86                |
| 373.15 | 267.17          | 233.46          | 60.73              | 238.14          | 54.33                |
| 378.15 | 261.86          | 227.48          | 57.14              | 228.02          | 51.68                |
| 383.15 | 252.17          | 242.92          | 62.20              | 245.85          | 48.93                |
| 388.15 | 251.49          | 287.95          | 79.08              | 301.80          | 45.55                |
| 393.15 | 246.41          | 248.66          | 55.54              | 235.04          | 43.01                |
| 398.15 | 241.41          | 230.32          | 31.96              | 171.60          | 40.28                |
| 403.15 | 234.28          | 228.67          | 47.92              | 209.36          | 38.02                |
| 408.15 | 231.64          | 218.00          | 48.16              | 204.93          | 35.25                |
| 413.15 | 226.87          | 206.91          | 44.90              | 192.78          | 31.13                |
| 423.15 | 219.69          | 198.01          | 43.35              | 185.29          | 27.85                |
| 433.15 | 208.48          | 228.97          | 53.35              | 221.04          | 23.93                |
| 443.15 | 199.70          | 185.45          | 40.44              | 173.21          | 21.53                |
| 453.15 | 191.19          | 171.71          | 34.74              | 154.48          | 18.74                |
| 463.15 | 189.47          | 234.33          | 56.47              | 230.07          | 16.34                |
| 473.15 | 174.96          | 146.73          | 21.05              | 111.15          | 15.47                |

PMMA/Silica,  $\theta = 1.0$

| T(K)   | $\gamma_s^-(T)$ | $\gamma_s^+(T)$ | $\gamma_s^{AB}(T)$ | $\gamma_s^d(T)$ | $\gamma_s^{tot.}(T)$ |
|--------|-----------------|-----------------|--------------------|-----------------|----------------------|
| 303.15 | 350.30          | 713.78          | 181.44             | 719.74          | 116.29               |
| 313.15 | 337.36          | 551.32          | 161.39             | 596.59          | 106.48               |
| 323.15 | 331.59          | 417.40          | 130.15             | 466.15          | 95.37                |
| 328.15 | 318.64          | 363.87          | 119.91             | 417.77          | 88.87                |
| 333.15 | 312.58          | 336.27          | 120.17             | 402.05          | 86.42                |
| 338.15 | 306.60          | 280.89          | 109.98             | 351.52          | 81.23                |
| 343.15 | 301.10          | 262.73          | 108.02             | 336.92          | 77.81                |
| 348.15 | 294.92          | 300.66          | 117.04             | 375.17          | 73.68                |
| 353.15 | 289.20          | 311.02          | 114.57             | 377.54          | 70.45                |
| 363.15 | 276.37          | 309.24          | 106.69             | 363.28          | 62.86                |
| 373.15 | 267.17          | 276.43          | 93.79              | 322.03          | 54.33                |
| 378.15 | 261.86          | 278.21          | 95.95              | 326.76          | 51.68                |

|        |        |        |        |        |       |
|--------|--------|--------|--------|--------|-------|
| 383.15 | 252.17 | 340.93 | 121.93 | 407.77 | 48.93 |
| 388.15 | 251.49 | 399.82 | 144.83 | 481.27 | 45.55 |
| 393.15 | 246.41 | 335.71 | 105.95 | 377.20 | 43.01 |
| 398.15 | 241.41 | 262.14 | 84.08  | 296.91 | 40.28 |
| 403.15 | 234.28 | 179.10 | 70.24  | 224.33 | 38.02 |
| 408.15 | 231.64 | 176.64 | 63.33  | 211.54 | 35.25 |
| 413.15 | 226.87 | 181.69 | 59.72  | 208.33 | 31.13 |
| 423.15 | 219.69 | 192.99 | 60.33  | 215.82 | 27.85 |
| 433.15 | 208.48 | 151.55 | 71.45  | 208.12 | 23.93 |
| 443.15 | 199.70 | 105.69 | 51.14  | 147.03 | 21.53 |
| 453.15 | 191.19 | 113.09 | 51.86  | 153.16 | 18.74 |
| 463.15 | 189.47 | 126.34 | 55.86  | 168.01 | 16.34 |
| 473.15 | 174.96 | 127.25 | 52.13  | 162.89 | 15.47 |

PMMA,  $\theta \gg 1$

| T(K)   | $\gamma_s^-(T)$ | $\gamma_s^+(T)$ | $\gamma_s^{AB}(T)$ | $\gamma_s^d(T)$ | $\gamma_s^{tot.}(T)$ |
|--------|-----------------|-----------------|--------------------|-----------------|----------------------|
| 303.15 | 350.30          | 188.57          | 101.05             | 276.07          | 116.29               |
| 313.15 | 337.36          | 156.18          | 84.06              | 229.16          | 106.48               |
| 323.15 | 331.59          | 138.53          | 75.94              | 205.14          | 95.37                |
| 328.15 | 318.64          | 135.58          | 80.61              | 209.09          | 88.87                |
| 333.15 | 312.58          | 156.07          | 88.07              | 234.48          | 86.42                |
| 338.15 | 306.60          | 116.14          | 66.60              | 175.89          | 81.23                |
| 343.15 | 301.10          | 119.72          | 73.12              | 187.13          | 77.81                |
| 348.15 | 294.92          | 121.07          | 78.28              | 194.70          | 73.68                |
| 353.15 | 289.20          | 116.28          | 76.34              | 188.44          | 70.45                |
| 363.15 | 276.37          | 97.42           | 67.50              | 162.19          | 62.86                |
| 373.15 | 267.17          | 77.31           | 60.95              | 137.29          | 54.33                |
| 378.15 | 261.86          | 86.48           | 64.81              | 149.74          | 51.68                |
| 383.15 | 252.17          | 107.07          | 78.06              | 182.85          | 48.93                |
| 388.15 | 251.49          | 59.29           | 49.49              | 108.34          | 45.55                |
| 393.15 | 246.41          | 81.20           | 41.81              | 116.54          | 43.01                |
| 398.15 | 241.41          | 74.12           | 58.50              | 131.70          | 40.28                |
| 403.15 | 234.28          | 69.06           | 62.09              | 130.97          | 38.02                |
| 408.15 | 231.64          | 67.04           | 64.24              | 131.26          | 35.25                |
| 413.15 | 226.87          | 61.16           | 60.98              | 122.14          | 31.13                |
| 423.15 | 219.69          | 64.14           | 63.07              | 127.21          | 27.85                |
| 433.15 | 208.48          | 89.16           | 84.00              | 173.08          | 23.93                |
| 443.15 | 199.70          | 50.06           | 58.98              | 108.68          | 21.53                |
| 453.15 | 191.19          | 41.85           | 54.11              | 95.17           | 18.74                |
| 463.15 | 189.47          | 37.40           | 53.81              | 89.73           | 16.34                |
| 473.15 | 174.96          | 28.18           | 46.51              | 72.41           | 15.47                |
